# Supplementary material for: A retrospective study on the prognostic value of preoperative C-reactive protein to albumin ratio in patients with oral cavity squamous cell carcinoma
Source: PeerJ. 2020 Jun 16;8:e9361. doi: 10.7717/peerj.9361 (PMC7304427; doi:10.7717/peerj.9361)
Supplement: Supplemental Information 1 [file peerj-08-9361-s001.xls]

## Sheet: 工作表2
sex	age	pT	pN	stage	CAR
Female	86.6932	2	0	2	0.005
Female	73.6904	1	1	3	0.283784
Male	80.7205	3	0	3	1.2475
Male	42.2904	4a	0	4a	1.05597
Female	60.8027	1	1	3	0.0521739
Female	56.0795	2	0	2	0.265128
Male	56.4603	4a	2b	4a	3.57868
Male	73.5534	4a	1	4a	1.49091
Male	39.6055	1	0	1	0.137447
Female	66.2137	4a	2b	4a	2.44465
Male	48.7753	2	0	2	0.065102
Male	67.6932	4a	0	4a	0.5155
Male	73.0986	2	0	2	0.538667
Male	44.7534	1	3	4b	0.643095
Male	53.0959	4a	2b	4a	0.839474
Male	62.2795	1	0	1	0.985106
Male	43.6027	2	0	2	0.0212245
Male	53.5863	1	0	1	0.0138889
Male	60.2466	3	0	3	0.172609
Male	45.3178	2	1	3	0.528542
Male	67.6795	2	0	2	0.0533333
Male	77.2247	2	1	3	2.04649
Male	54.0822	4	0	4	0.0580952
Male	71.1068	1	0	1	1.87689
Male	49.2301	2	2c	4a	1.0387
Male	63.6767	1	2b	4a	0.0864286
Male	67.4493	2	0	2	0.0288889
Male	46.3096	2	0	2	3.06
Male	78.937	1	0	1	0.298095
Male	45.4274	2	2b	4a	0.211633
Male	47.8521	4a	2c	4	0.102917
Male	48.4877	2	1	3	0.145788
Male	50.9753	1	0	1	0.00595483
Male	59.126	4a	0	4a	0.520196
Male	38.3671	2	2b	4a	2.07028
Male	78.2301	2	2b	4a	0.112534
Male	60.0603	1	0	1	1.99661
Male	46.211	1	0	1	0.070913
Male	44.0411	1	0	1	1.2837
Male	38.2521	1	0	1	1.45229
Male	77	4a	0	4a	0.0165072
Male	30.9452	2	2c	4	0.0215933
Female	55.3068	2	1	3	0.186557
Male	51.8493	4a	2b	4a	3.58678
Male	51.6904	4a	0	4a	0.0827368
Male	62.1315	2	0	2	0.429876
Male	59.9726	2	0	2	0.177551
Male	69.9863	1	1	3	0.0199557
Male	55.3397	4a	0	4	0.0203057
Male	46.8986	1	0	1	0.0797297
Male	57.6904	2	0	2	0.102619
Male	59.3699	4a	0	4a	0.0150424
Male	61.7699	4a	0	4	0.128306
Male	50.2658	3	0	3	0.204878
Male	51.8849	2	1	3	0.26
Female	83.4055	2	0	2	1.10079
Male	71.5315	2	0	2	0.00594315
Male	69.937	4b	0	4b	0.540573
Male	45.8438	4b	2c	4b	0.760625
Male	63.3781	1	0	1	0.328118
Male	51.3945	2	2b	4a	0.0337423
Male	55.1096	1	0	1	0.0158696
Male	55.8356	2	0	2	0.0229167
Male	67.4603	1	0	1	0.0749373
Female	68.4822	1	1	3	0.137284
Male	67.5452	4a	0	4a	3.20173
Male	45.4164	1	0	1	2.00664
Female	40.0055	1	0	1	0.0120763
Male	63.2055	4a	0	4a	0.19556
Male	49.4986	4a	2b	4a	0.0402516
Male	42.3178	4a	0	4a	0.217
Male	42.2932	1	0	1	0.0669339
Male	63.3151	2	1	3	0.175947
Male	47.1808	2	0	2	0.0333333
Male	67.263	4a	1	4a	1.77963
Male	38.5753	4a	2c	4a	2.8369
Male	60.8438	3	2a	4a	0.205774
Male	59.4712	3	2b	4a	1.45854
Male	65.3945	1	0	1	0.0365385
Male	62.3562	3	1	3	0.0747126
Male	49.2959	1	0	1	0.0654902
Male	57.4959	4a	1	4a	0.211209
Female	54.6027	2	2c	4	0.476889
Male	71.0384	2	0	2	0.627252
Female	60.2548	1	0	1	0.0343882
Male	72.2466	2	1	3	1.15734
Female	58.3452	4a	0	4a	0.14934
Male	57.6877	1	0	1	0.0461197
Male	57.989	2	0	2	0.29005
Male	57.7534	4b	0	4b	0.991102
Male	53.1096	1	1	3	0.0216102
Male	75.5123	3	2b	4a	0.0339703
Male	51.5151	1	0	1	0.015507
Male	60.337	4a	1	4a	0.0493333
Male	58.2027	2	0	2	0.0261134
Male	56.3342	1	1	3	0.00952381
Male	59.1397	1	1	3	0.0487356
Male	64.6137	1	2b	4a	0.263636
Male	43.4904	4a	2c	4a	3.4479
Male	77.6301	1	0	1	0.0603982
Male	42.1863	4a	0	4a	0.0625498
Male	62.4493	1	2a	4a	1.2338
Male	52.9808	2	0	2	0.0357143
Female	62.6247	3	0	3	0.0808279
Female	73.8658	2	0	2	0.0882096
Male	76.4603	1	0	1	0.0216359
Male	81.8795	3	0	3	0.474373
Male	69.4466	2	0	2	0.0308534
Male	62.3315	1	0	1	0.0581818
Female	44.2877	1	0	1	0.00778032
Male	71.7342	4a	2b	4a	0.943088
Male	51.2521	3	2b	4a	0.166905
Female	61.737	1	0	1	0.0311321
Male	69.5205	4a	0	4a	1.5465
Male	66.211	2	0	2	0.0233996
Male	60.4	2	0	2	0.0266667
Male	45.1753	4a	0	4a	0.0153132
Male	63.2548	4a	0	4a	2.0637
Male	52.8329	2	1	3	1.50804
Male	67.3068	1	0	1	0.0730942
Male	60.3507	2	1	3	1.28091
Male	63.2603	2	0	2	0.0107221
Male	41.4219	1	0	1	0.0255965
Male	55.463	3	2b	4a	2.57679
Male	56.0055	4a	0	4	0.0215517
Male	58.8795	1	0	1	0.383333
Male	42.5041	4a	2b	4a	1.38222
Female	79.0438	2	0	2	1.62533
Male	56.8822	4a	1	4a	0.0882957
Male	37.4192	4a	2c	4a	5.47989
Male	75.3205	4a	2c	4a	0.260104
Male	62.7589	2	0	2	1.6637
Male	46.6795	2	2b	4a	0.252
Female	67.8192	2	0	2	0.0431211
Male	46.3315	2	0	2	0.173696
Male	53.4575	1	2b	4a	0.0063655
Male	70.5123	1	1	3	0.491351
Male	50.3507	1	0	1	0.00445736
Male	55.7973	4a	0	4a	0.08125
Male	66.6849	1	0	1	0.00786517
Male	78.1534	2	0	2	0.0230932
Male	65.5616	2	2b	4a	0.0454327
Male	59.1644	4a	0	4a	0.0697778
Male	51.6027	2	0	2	0.475
Male	76.326	1	0	1	0.544375
Male	69.2959	4a	0	4a	0.00847826
Male	68.0959	3	0	3	5.12168
Female	61.3014	4a	2b	4a	0.405353
Male	68.137	4b	0	4b	0.7196
Male	55.5205	1	0	1	0.0407186
Male	70.989	1	0	1	0.0376623
Male	71.9014	2	0	2	0.0171739
Male	55.526	1	0	1	0.0648069
Female	75.9808	1	0	1	0.073913
Male	83.1863	1	0	1	0.0407745
Male	49.8438	1	2b	4a	0.0175115
Male	61.3041	4a	0	4a	0.831481
Male	53.7589	4a	0	4a	0.0292035
Male	55.8438	4a	0	4a	0.00655431
Male	51.1945	4a	0	4a	0.434857
Male	55.1644	2	2b	4a	0.37573
Male	38.7096	2	0	2	0.0608247
Male	48.9699	4a	0	4a	0.241739
Male	43.8247	4a	2b	4a	0.132983
Male	68.9699	1	0	1	0.148649
Male	58.474	2	0	2	0.0380531
Male	63.537	2	1	3	0.0774468
Male	43.7342	4a	2c	4b	0.269727
Male	51.3863	4b	0	4b	1.27929
Male	55.8932	4a	0	4a	0.0483784
Male	52.0603	1	1	3	0.0265537
Male	62.4986	4a	0	4a	0.00727273
Male	52.2466	4a	2b	4a	1.48867
Male	62.5068	2	0	2	0.0278802
Male	58.411	2	0	2	0.0239583
Female	80.2137	1	0	1	0.284
Male	73.7397	1	0	1	0.0101099
Male	57.7507	4a	0	4a	0.0754098
Male	64.3041	1	0	1	0.0126411
Male	70.4603	2	0	2	1.14645
Male	53.0137	4a	2b	4a	0.283929
Male	52.3288	1	0	1	0.00910891
Male	52.3781	4a	0	4a	0.0924078
Female	47.7096	2	1	3	0.00798122
Male	49.6164	4a	0	4a	0.190643
Male	62.1753	1	0	1	0.0162162
Male	52.5205	4a	0	4a	0.554525
Male	56.0164	4a	0	4a	0.239318
Male	64.3041	1	0	1	0.222529
Male	60.5397	2	0	2	0.00719101
Male	40.5288	4b	0	4b	0.0808756
Male	59.2438	1	0	1	0.0569231
Male	45.0466	4a	2b	4a	1.67583
Male	59.4247	4a	0	4a	0.136256
Male	71.0904	2	0	2	0.0171694
Male	67.8877	4a	0	4a	1.63285
Male	46.9288	4b	0	4b	0.0133721
Male	44.5342	4a	0	4a	0.02343
Male	50.6137	4a	0	4a	0.0197368
Male	64.989	2	0	2	0.0914943
Male	37.6411	2	0	2	0.0327044
Male	66.4795	4a	0	4a	0.0292857
Male	73.8849	4a	0	4a	0.423485
Male	44.8192	2	0	2	0.00926724
Male	50.4575	2	0	2	0.0584
Male	55.3918	2	0	2	0.012
Male	56.7671	2	0	2	0.0280851
Male	48.8575	1	2b	4a	0.0354701
Male	46.6274	3	0	3	0.0447423
Female	41.3562	1	0	1	0.0119438
Male	61.526	4a	2c	4a	3.18353
Male	57.4521	4a	0	4a	0.0673597
Male	57.6137	4a	0	4a	0.0564103
Male	56.989	2	0	2	0.0389002
Male	55.2329	2	0	2	0.0315668
Male	56.4247	4a	0	4a	0.123056
Male	49.3014	2	1	3	0.0567823
Male	50.7315	4a	2b	4a	0.132996
Male	51.6767	1	2b	4a	0.051046
Male	57.0055	2	2b	4a	0.02
Male	66.737	1	0	1	0.0412178
Male	47.8603	4b	2b	4b	1.14165
Male	39.1699	4a	2b	4a	0.0351738
Male	75.0795	3	0	3	0.0178174
Male	57.4521	2	2a	4a	0.0319712
Male	62.5671	2	1	3	0.213348
Male	60.3452	2	0	2	0.0893905
Male	68.1945	4a	0	4a	0.247124
Male	53.0932	4b	0	4b	0.522683
Male	61.0548	4b	2b	4b	0.393353
Male	56.9151	1	0	1	0.0317697
Male	57.2904	4a	0	4a	0.0415418
Male	64.0329	2	0	2	0.0114679
Male	56.7699	4a	0	4a	0.0475983
Male	62.5315	4a	2c	4a	0.348872
Male	45.137	2	1	3	0.0747433
Female	45.1616	1	2b	4a	0.0379386
Male	60.6548	2	0	2	0.0198704
Male	68.7562	4a	2b	4a	0.101969
Male	60.1342	4a	1	4a	0.0366953
Female	45.4795	4a	0	4a	0.0262537
Male	52.5753	2	0	2	0.0390135
Male	51.7562	1	0	1	0.0506912
Male	61.3589	4a	0	4a	0.195116
Male	38.937	4a	2a	4a	0.0316372
Female	77.3233	4a	0	4a	0.178781
Male	52.3699	2	2b	4a	0.0571429
Male	47.4712	1	0	1	0.019656
Male	68.0712	1	0	1	0.0257511
Male	31.6247	1	0	1	0.109382
Male	50.5096	1	0	1	0.0152968
Male	64.6822	4a	2b	4a	0.0411504
Male	47.326	4b	2b	4b	0.0706935
Male	63.1205	1	0	1	0.0142857
Male	58.7808	4b	0	4b	0.0242054
Male	59.7178	1	0	1	0.00553279
Male	46.1205	2	0	2	0.135957
Male	78.1781	4a	2b	4a	0.171562
Male	54.4356	1	0	1	0.219861
Male	64.2082	1	0	1	0.02
Male	47.8795	1	0	1	0.0768443
Male	57.2466	4a	0	4a	0.32517
Male	44.0712	4a	2a	4a	0.0515222
Male	46.6301	4a	0	4a	0.0183585
Male	69	2	0	2	0.0576837
Male	52.6712	4a	2b	4a	0.626014
Male	41.863	2	2b	4b	1.13454
Male	49.7123	2	0	2	0.0350649
Male	45.8274	4b	0	4b	3.12138
Male	72.3397	2	0	2	0.014094
Male	69.2493	4a	0	4a	0.00676329
Male	58.7233	4a	0	4a	0.163657
Male	65.5781	3	2b	4a	0.56893
Male	70.011	4a	0	4a	0.071831
Male	60.9781	2	0	2	0.282798
Male	58.0493	4b	0	4b	0.279007
Male	50.5178	2	1	3	0.0536797
Male	53.874	1	0	1	0.067284
Female	45.1178	1	0	1	0.0443694
Male	70.9151	4a	2b	4a	0.0174946
Male	79.4411	1	0	1	3.43643
Male	68.1397	2	0	2	0.0795455
Male	53.2822	1	0	1	0.0785124
Female	62.5233	1	0	1	0.0437358
Male	72.5479	1	0	1	0.0334917
Male	61.9753	4a	2b	4a	0.00883002
Male	59.3507	4a	0	4a	0.0139364
Male	56.5205	4a	2b	4a	0.101624
Female	62.3616	2	0	2	0.00446429
Male	57.411	3	0	3	0.48776
Male	63.474	2	0	2	0.0744035
Male	58.6411	1	2b	4a	0.0172336
Male	85.4849	1	0	1	0.150542
Male	57.0822	4b	2b	4b	0.252995
Male	71.8219	1	0	1	0.0422131
Male	53.2959	1	0	1	0.0210066
Male	77.6274	4a	2b	4a	0.464115
Male	79.0356	4	1	4	2.29581
Male	68.0192	2	0	2	0.107223
Male	53.1781	4a	3	4b	0.161045
Female	69.537	2	3	4b	0.018956
Female	43.9644	3	2c	4a	0.875
Male	39.5342	2	0	2	0.0157428
Male	39.9397	3	0	3	0.144512
Male	58.0575	2	0	2	0.0142077
Male	80.9123	2	0	2	0.0127315
Male	66.6904	1	0	1	0.0729787
Male	62.0137	4a	0	4a	0.00923788
Male	51.1315	3	0	3	0.0322506
Male	33.2712	4a	0	4a	0.00936709
Male	56.2247	4a	3b	4b	1.72434
Male	54.0438	4b	2b	4b	1.68585
Male	76.3233	4a	2c	4a	0.579024
Female	82.8493	2	2b	4a	0.0316176
Male	52.7671	2	1	3	0.0594037
Male	56.1616	2	0	2	0.222981
Male	64.5205	3	1	3	0.216433
Male	45.4986	3	2b	4a	0.124131
Male	47.7671	4b	2b	4b	0.131797
Male	51.5205	2	0	2	0.0359031
Male	52.7342	4a	0	4a	0.126596
Male	40.3726	1	0	1	0.0501014
Male	45.1397	3	0	3	0.136989
Male	61.8192	4a	0	4a	0.085
Male	58.7616	1	0	1	0.0180401
Male	45.2301	4a	0	4a	0.0929742
